# Supplementary material for: Performances Evaluation of a Low-Cost Platform for High-Resolution Plant Phenotyping
Source: Sensors (Basel). 2020 Jun 2;20(11):3150. doi: 10.3390/s20113150 (PMC7308841; doi:10.3390/s20113150)
Supplement: Supplementary file 1 [file sensors-20-03150-s001.xlsx]

## Sheet: S1Supplementary_Material
a)	Engine_Control
Price of components used for the realization of engine control module (including platform's main structure and 10 rotating plates)
		Component	Quantity	Price per unit (€)	Price (€)
		NEMA 17 Stepper Motor JK42HM	10	12.3	123
		Ball Bearing 70*90*10	10	10.35	103.5
		Thrust Bearing 35*62*18	10	4.126	41.26
		Voltage Regulators LM7805	10	1	10
		Switches	40	0.25	10
		DRV8825 Motor Drivers	10	2.7	27
		GT2 Belt 5m + GT2 Pulley 16 Teeth	1	14.56	14.56
		Aluminum tubes	2	9	18
		Rectangular Profile	1	11.8	11.8
		Ceramic Capacitor 0.33uF	10	0.3	3
		Ceramic Capacitor 0.10uF	10	0.28	2.8
		3D-printing of Plates	20	14.5	290
		Logic Gates HCF401068E - SN74HC11N	20	1	20
		Connectors JST 5pin M/F	10	1	10
		Connectors JST 2pin M/F	10	1	10
				Total (€)	694.92
				Total ($)	758.06
b)	Data_Logger
Price of components used for the realization of data logger module
		Component	Quantity	Price per unit (€)	Price (€)
		Arduino Nano V3.0	2	5.335	10.67
		Voltage Regulators LM7805	2	0.5	1
		4N35 Optocoupler	1	1.5	1.5
		DS1307 Real Time Clock Module	1	1.35	1.35
		Battery CR2032 3V	1	1	1
		Shutter Release Cable Nikon	1	5.71	5.71
		Ceramic Capacitor 0.33uF	2	1.5	3
		Ceramic Capacitor 0.10uF	2	1.4	2.8
		Electrical Capacitor 220 uF	2	1	2
		Resistances 150 Ohm	10	0.25	2.5
		SD Card Reader	1	1.5	1.5
		Nrf24l01+	1	1	1
		PCB	1	3	3
		Jack Connector 2.5mm F	1	4	4
		Connectors JST 2pin M/F	1	1	1
		Connectors JST 5pin M/F	1	1	1
				Total (€)	43.03
				Total ($)	46.94
c)	Data_Acquisition
Price of components used for the realization of 10 data acquisition module
		Component	Quantity	Price per unit (€)	Price (€)
		PCB Electronic Board	10	3.411	34.11
		Transistor NPN MMBT3904	10	0.547	5.47
		Transistor PNP MMBT3906	20	0.2735	5.47
		Connector JST 1.5mm ZH 2pin	20	0.5345	10.69
		Capacitor 2.2 uF	10	0.422	4.22
		DS3231 RTC	10	2.396	23.96
		Atmega328P_PU	10	2.33	23.3
		BME_280 Sensor T-P-U	10	4.998	49.98
		USB Port F	20	0.7245	14.49
		Slot 18650 (Battery case)	10	2.048	20.48
		Capacitor 470 pF	20	0.215	4.3
		Resistances T1	10	0.014	0.14
		Resistances T2	10	0.014	0.14
		Resistances T3	10	0.014	0.14
		Resistances I2c	20	0.007	0.14
		Micro-USB Port F	20	0.39	7.8
		Oscillator 16Mhz	10	0.176	1.76
		Diode ln5819	10	0.212	2.12
		Socket 28 Pin	10	0.267	2.67
		Hx711 ADC 24 Bit	10	0.942	9.42
		Mini-photovoltaic Cell	10	5.06	50.6
		2.54mm Pin M	220	0.0157727	3.47
		2.54mm Pin F	220	0.00977273	2.15
		Soil Humidity Sensor	10	1.349	13.49
		Regolatore DC/DC MIC5205-5Y	10	0.295	2.95
		Regulator DC/DC MIC5205-3.3Y	10	0.296	2.96
		Nrf24l01+	10	1.5	15
		Litio SAMSUNG INR 18650 2500MAh	20	0.695	13.9
		Capacitor 22 pF	20	0.1	2
		Weight Scale	10	12	120
		Box	10	2	20
				Total (€)	467.32
				Total ($)	509.78
